# Supplementary material for: Novel chemokine-like activities of histones in tumor metastasis
Source: PubMed Central journal article supplement (PMC5308686; doi:10.18632/oncotarget.11226), 2016-08-11
Supplement: oncotarget-07-61728-s001.pdf [file oncotarget-07-61728-s001.pdf]

## Novel chemokine-like activities of histones in tumor metastasis

### SUPPLEMENTARY TABLE

Supplementary Table S1: Clinicopathological information of HCC patients

| Clinicopathological features    | Number      |
|---------------------------------|-------------|
| <b>Sex</b>                      | 17          |
| <b>Male</b>                     | 13 (76.47%) |
| <b>Age (mean)</b>               | 51.59±9.42  |
| <b>Cirrhosis</b>                | 8 (47.06%)  |
| <b>Hepatitis (antibody)</b>     |             |
| HBV                             | 10 (58.80%) |
| HCV                             | 1 (5.88%)   |
| <b>No. viral hepatitis</b>      |             |
| ETOH                            | 0           |
| NASH                            | 1 (5.88%)   |
| other                           | 5 (29.41%)  |
| <b>Tumor size</b>               |             |
| ≥5 cm                           | 11 (64.7%)  |
| <b>No. of nodules</b>           |             |
| ≥2                              | 4(23.5%)    |
| =1                              | 13(74.5%)   |
| <b>Child-Pugh score</b>         |             |
| >5                              | (29.41%)    |
| <b>No. of lymph node</b>        |             |
| ≥2                              | 2(11.67%)   |
| <b>Cellular differentiation</b> |             |
| Well                            | 0           |
| Moderate                        | 7 (41.18%)  |
| Poor                            | 1 (6%)      |
| Without pathology               | 9 (52.94%)  |
| <b>Venous invasion</b>          |             |
| present                         | 6 (35.29%)  |
| <b>Tumor stage</b>              |             |
| Stage 0                         | 0           |
| Stage I                         | 3 (17.65%)  |
| Stage II                        | 4 (23.53%)  |
| Stage III                       | 1 (5.88%)   |
| Stage IV                        | 7 (41.18%)  |
